# Supplementary material for: Poly(vinylpyrrolidone) supported copper nanoclusters: glutathione enhanced blue photoluminescence for application in phosphor converted light emitting devices
Source: Royal Society of Chemistry journal article supplement (doi:10.1039/c6nr00806b), 2016-01-01
Supplement: c6nr00806b1.pdf [file c6nr00806b1.pdf]

## Poly(vinylpyrrolidone) Supported Copper Nanoclusters: Glutathione Enhanced Blue Photoluminescence for Application in Phosphor Converted Light Emitting Devices

Zhenguang Wang,<sup>a</sup> Andrei S. Sussha,<sup>a</sup> Bingkun Chen,<sup>a,b</sup> Claas Reckmeier,<sup>a</sup> Ondrej Tomanec,<sup>c</sup> Radek Zboril,<sup>c</sup> Haizheng Zhong<sup>b</sup> and Andrey L. Rogach<sup>a,\*</sup>

*a. Department of Physics and Materials Science and Centre for Functional Photonics (CFP), City University of Hong Kong, 83 Tat Chee Avenue, Kowloon, Hong Kong SAR.*

*b. Beijing Key Laboratory of Nanophotonics and Ultrafine Optoelectronic Systems, School of Materials Science & Engineering, Beijing Institute of Technology, Beijing, 100081, China.*

*c. Regional Centre of Advanced Technologies and Materials, Faculty of Science, Departments of Physical and Analytical Chemistry, Palacky University in Olomouc, 77146, Czech Republic*

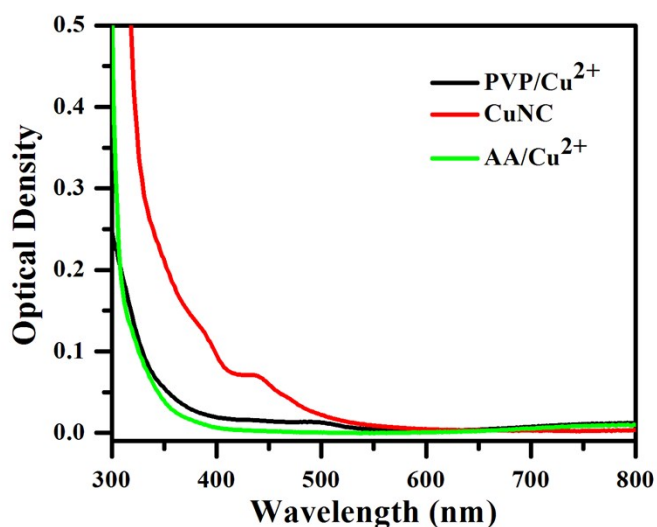

Figure S1. UV-Visible absorption spectra of Cu NCs and the mixtures of PVP/Cu<sup>2+</sup> and AA/Cu<sup>2+</sup>.

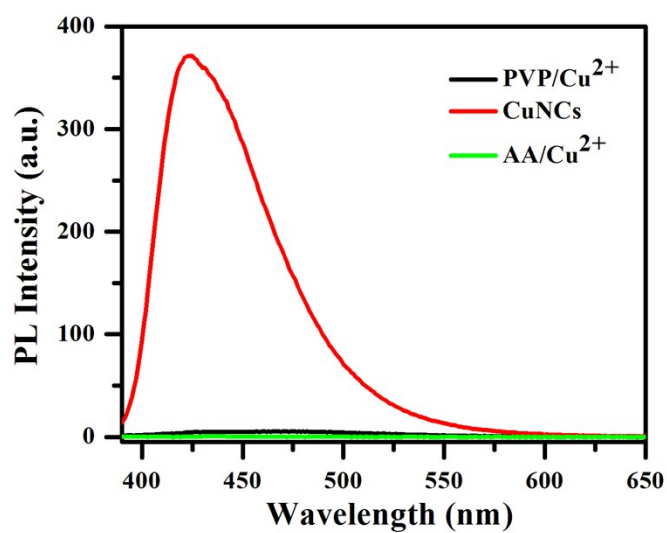

Figure S2. PL spectra of Cu NCs and the mixtures of PVP/Cu<sup>2+</sup> and AA/Cu<sup>2+</sup>.

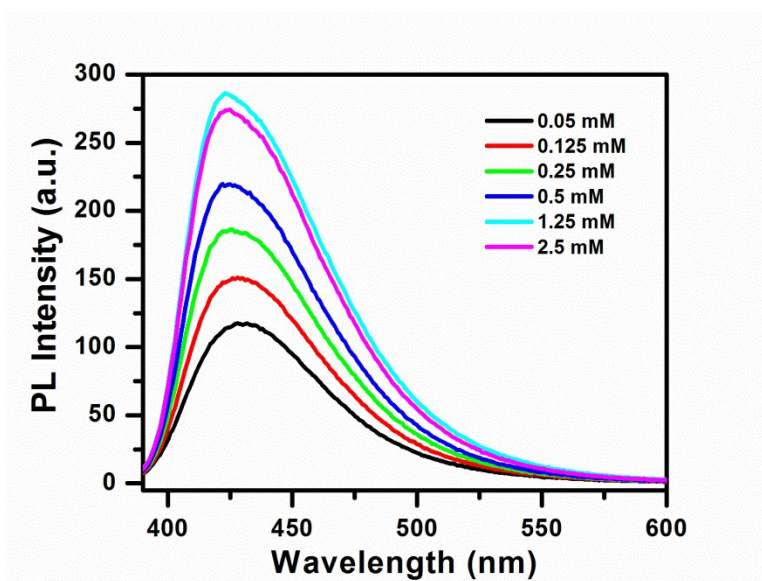

Figure S3. Relationship between PL intensity of as-prepared Cu NCs and the concentration of PVP.

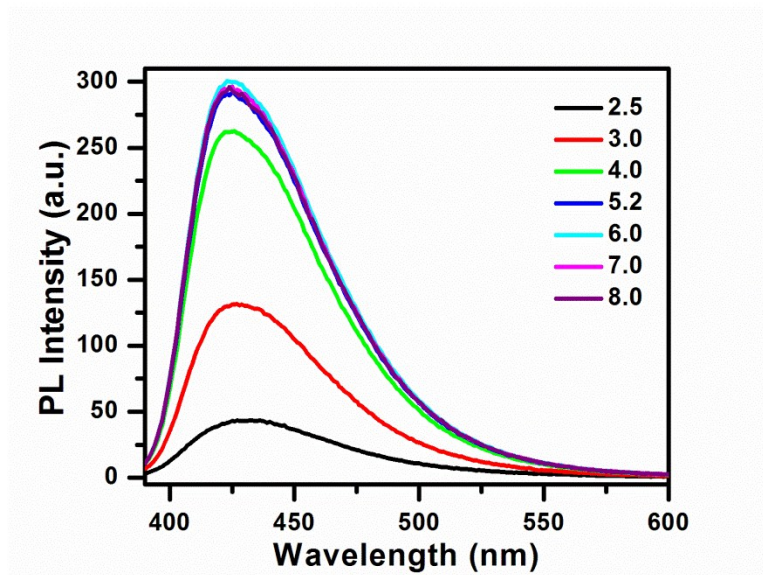

Figure S4. Relationship between PL intensity of as-prepared Cu NCs and pH of PVP solution.

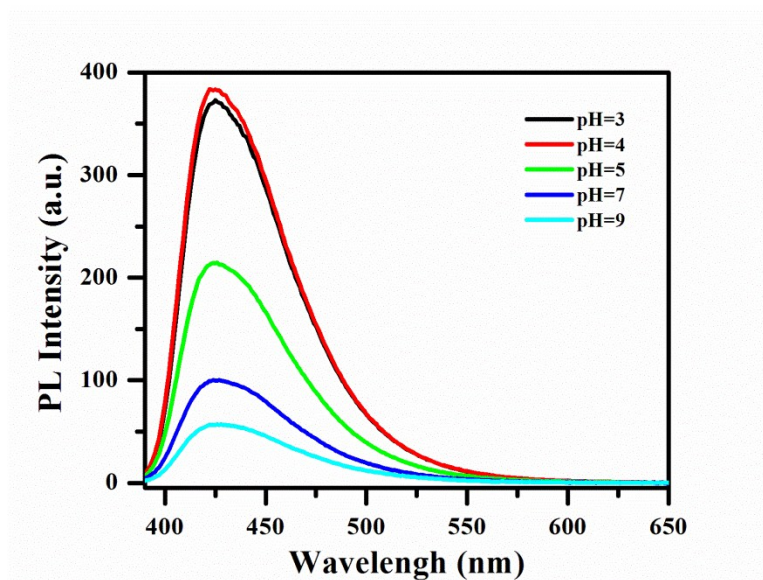

Figure S5. The effect of pH on the PL enhancement of as-prepared Cu NCs treated with GSH.

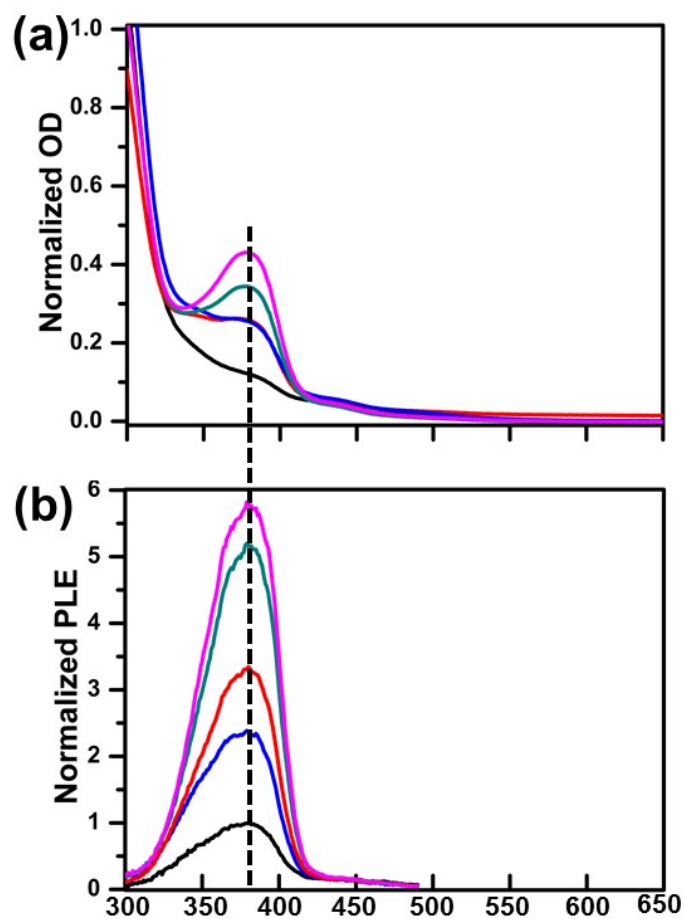

Figure S6. Absorption (a) and PLE (b) spectra of as-prepared Cu NCs (black) and those treated by different ligands (cysteine, cysteamine, ME and MPA from top to down), at the emission wavelength of 500 nm.

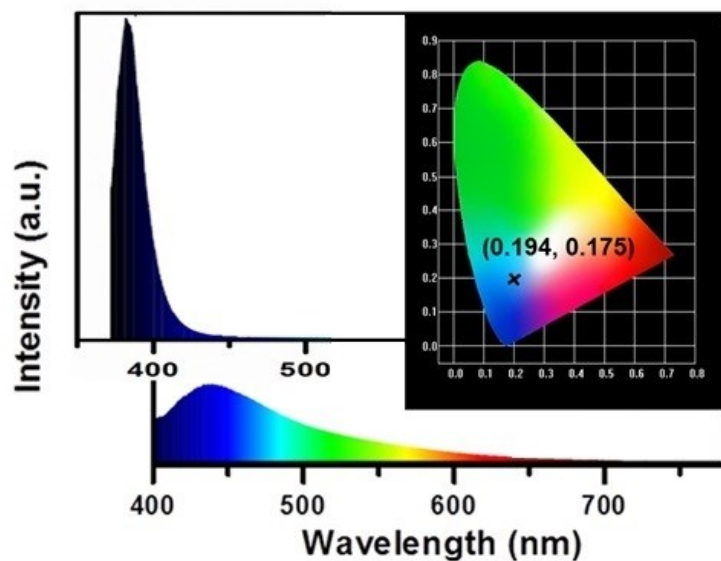

Figure S7. Emission spectrum of blue LED fabricated by using GSH treated Cu NCs shown alongside with emission spectrum of the GaN LEDs chip. CIE chromaticity coordinate of Cu NC based LED is shown on the right.

Table S1. Performance comparison of fabricated white LEDs with previously reported<sup>1,2</sup> metal NC-based white LEDs.

| Reference | CIE(x, y)    | CCT (K) | CRI | Luminous Efficiency (lmW <sup>-1</sup> ) |
|-----------|--------------|---------|-----|------------------------------------------|
| 1         | (0.32, 0.36) | /       | /   | /                                        |
| 2         | (0.31, 0.36) | 6577    | 88  | /                                        |
| This work | (0.35, 0.33) | 4742    | 92  | 10                                       |

## References

1. Z. Wu, J. Liu, Y. Gao, H. Liu, T. Li, H. Zou, Z. Wang, K. Zhang, Y. Wang, H. Zhang and B. Yang, *J. Am. Chem. Soc.*, 2015, **137**, 12906.
2. J. Liu, Z. Wu, T. Li, D. Zhou, K. Zhang, Y. Sheng, J. Cui, H. Zhang and B. Yang, *Nanoscale*, 2016, **8**, 395.
